# Supplementary material for: Biallelic variant in cyclin B3 is associated with failure of maternal meiosis II and recurrent digynic triploidy
Source: PubMed Central journal article supplement — J Med Genet. 2020 Sep 16;58(11):783–8. doi: 10.1136/jmedgenet-2020-106909 (PMC8551973; doi:10.1136/jmedgenet-2020-106909), 2020-09-16
Supplement: jmedgenet-2020-106909supp001.pdf [file jmedgenet-2020-106909supp001.pdf]

1 **Supplementary Data**

2 **Materials and Methods**

3 **Human subject recruitment**

4 Blood samples were collected from the probands, their parents, their partners and other siblings.

5 Tissue samples were collected from the products of conception III-12 and III-15 derived from  
6 miscarriage pregnancies of II-7, for histopathological examination and DNA analysis. DNA  
7 extraction was carried out from 5 to 10 ml of frozen EDTA blood samples by using the salting-out  
8 procedure<sup>1</sup>. DNA from frozen fetus tissues was extracted with the TRIZOL reagent (Sigma, USA),  
9 as described<sup>2</sup>.

10

11 **Karyotyping, array comparative genomic hybridization (aCGH) and SNP-array analysis.**

12 Chromosome analysis of peripheral blood was performed for both male and female partners (II-5  
13 and II-6, and II-7 and II-8). Metaphase spreads were made from phytohemagglutinin-stimulated  
14 lymphocytes according to the standard procedure to generate a resolution of 550 bands per haploid  
15 set<sup>3</sup>. Slides were processed for G-banding using trypsin–Giemsa (GTG)-banded chromosome  
16 preparations<sup>3</sup>. At least 25 metaphases were analyzed for each individual. Results were reported in  
17 accordance with the latest International System for Human Cytogenetic Nomenclature<sup>4</sup>.

18 aCGH analysis of II-5, II-6 and III-12 was performed with the 24sure Microarray Pack version 3.0  
19 (Illumina; cat. #: PR-10-408702-PK, USA). DNA labeling and hybridization were performed by  
20 using the Agilent Oligonucleotide Array-Based CGH for Genomic DNA Analysis protocol (V 7.3,  
21 2014). The array data was read by InnoScan 900 microarray scanner (INNOPSYS, France). The  
22 BlueFuse Multi v3.1 was used to analyze the 24sure experiments. We reported the median log<sub>2</sub>  
23 ratio for each chromosome as the index of aneuploidy as analyzed by BlueFuse Multi software.

24 SNP array analysis of II-7 and II-8 was carried out with the CytoScan HD Array (Thermo Fisher  
25 Scientific) according to manufacturer's protocol. Data analysis was performed using Chromosome  
26 Analysis Suite Software version 4.0 (Thermo Fisher Scientific) following a standardized pipeline.  
27 Briefly: i) the raw data file (.CEL) was normalized using the default options; ii) an unpaired  
28 analysis was performed using 270 HapMap samples as a baseline in order to obtain copy numbers  
29 value and regions of homozygosity (ROHs) from .CEL files. The amplified and/or deleted regions  
30 were detected using a standard Hidden Markov Model (HMM) method. Size threshold for analysis  
31 was kept as 5 Kb for copy number variations (CNVs), and 1 Mb for ROHs. In order to identify  
32 clinical or functionally relevant genomic variants, we compared all chromosomal alterations  
33 identified to those collected in our internal database of ~5,000 patients studied by SNP Arrays  
34 since 2010 and public databases, including the Database of Genomic Variants (DGV; available  
35 online at: <http://projects.tcag.ca/variation/>), DECIPHER (available online at:  
36 <https://decipher.sanger.ac.uk/>) and ClinVar (available online at:  
37 <https://www.ncbi.nlm.nih.gov/clinvar/>).

38

### 39 **Histological analysis**

40 The product of conception III-12 was received in Bouin's solution at the department of pathology,  
41 Royan Reproductive Center. Fixed biopsies were embedded in paraffin block, cut into 5- $\mu$ m-thick  
42 sections and stained with hematoxylin and eosin (H&E, Bahar Afshan, Iran) using standard  
43 procedures<sup>5</sup>.

44

### 45 **DNA methylation analysis**

46 DNA methylation of the Differentially Methylated Regions (DMRs) of seven imprinted loci were  
47 investigated in the DNA extracted from tissues of the product of conceptus III-15 by sodium  
48 bisulfite conversion and pyrosequencing, as already described<sup>6</sup>. The control DNA for the analysis  
49 of imprinted DMR methylation derived from peripheral blood leukocytes of normal individuals.  
50 The level of methylation of the imprinted DMRs is maintained at 50% (one allele fully methylated)  
51 in somatic cells throughout pre- and post-natal development<sup>7</sup>. Primer sequences are reported in  
52 Supplementary Table 6.

53

#### 54 **Polymorphic sequence-tagged sites (STSs) analysis**

55 The peri-centromeric and distal STS markers D1S498, TPOX, D4S405, D4S428, D5S1969,  
56 D5S630, D5S400, D5S818, D6S257, D6S460, D7S820, D8S532, D9S1874, D10S1790,  
57 D12S1663, D13S175, D13S317, D15S128, D16S539, D19S414, D19S566, D19S865 and  
58 DXS991 were genotyped by PCR and electrophoresis. Amplification was carried out on 50 ng of  
59 genomic DNA in a volume of 20 µl, with initial denaturation at 95°C for 4 min, followed by  
60 denaturation step at 94°C for 30 secs, annealing step at 60°C or 55°C for 30 secs, polymerization  
61 step at 72°C for 30 secs and final extension step at 72°C for 7 min. The amplification products  
62 were resolved by capillary electrophoresis by using an Applied Biosystems 3130 DNA Analyzer  
63 or by electrophoresis through polyacrylamide gel and silver staining. Allele size and peak height  
64 were determined by using GeneScan software (Applied Biosystems, Foster City, CA). Primer  
65 sequences are reported in Supplementary Table 6.

66

#### 67 **Whole exome sequencing (WES)**

68 WES was performed on DNAs extracted from I-3, I-4, II-6 and II-7. Enrichment of coding regions  
69 and intron/exon boundaries were carried out using the ‘all Exon V5 kit’ (Agilent Technologies,  
70 Wokingham, UK). DNA sequencing was done at the Plateforme Biopuces et Séquençage IGBMC,  
71 Illkirch, France, on the HiSeq 2000 from Illumina®.

72

### 73 **Exome data analysis**

74 All steps from sequence mapping to variant selection, were performed using the ExSQLibur  
75 pipeline. Short reads were aligned to the human reference genome (hg18) using MAGIC  
76 (SEQC/MAQC-III Consortium, 2014). Duplicates and reads that mapped to multiple locations in  
77 the exome were removed from further analysis. Moreover, positions with sequence coverage <10  
78 on either forward or reverse strand, were excluded. Single nucleotide variants (SNV) and small  
79 insertions/deletions (INDELs) were identified. We also compared these rare variants to an in-house  
80 database including 56 control exomes from subjects analyzed for unrelated pathologies and not  
81 described as having experienced RPL. All homozygous variants present in this control database  
82 were considered not to be linked with RPL and thus excluded as candidate. Variants with a minor  
83 allele frequency greater than 5% in the NHLBI ESP6500 or in 1000 Genomes Project Phase 1 data  
84 sets, or greater than 1% in ExAC and gnomAD, were excluded. Moreover, variants that scored as  
85 ‘tolerated’ by SIFT and as ‘benign’ by Polyphen-2 were excluded. The script of the pipeline used  
86 is reported as Supplementary Material.

87

### 88 **Segregation analysis by Sanger sequencing**

89 The selected candidate pathogenic variant was validated by Sanger sequencing in ten family  
90 members (I-3, I-4, II-5, II-6, II-7, II-8, II-9, II-10, III-12 and III-15). PCR primers (Supplementary

91 table 6) were designed using the Primer3 software (version 0.4.0; 29). Conventional PCR was  
92 performed using Taq DNA Polymerase Master Mix (Ampliqon, Odense, Denmark). PCR was  
93 performed at 94 °C for 4 min, followed by 30 cycles at 94 °C for 45 s, 60 °C for 45 s and 72 °C  
94 for 45 s. A final extension step is performed for 5 min at 72°C. The PCR products were assayed  
95 by using the 3130xl Genetic Analyzer (Applied Biosystems, Foster City, CA, USA). Final data  
96 were analyzed by using the Sequencing Analysis version 5.2 (Applied Biosystems, Foster City,  
97 CA, USA) and FinchTV version 1.5.0 (Geospiza Inc.).

98

#### 99 **GnRH antagonist protocol and oocyte retrieval**

100 The proband had an ultrasound scan (USS) performed on day 3 of menstrual cycle. Medication of  
101 the proband with recombinant FSH (rFSH) (300 IU Gonal-F, EMD Serono per day) was initiated  
102 at the day of USS and continued for 5 consecutive days, while follicular development was  
103 monitored by transvaginal ultrasound. The optimal rFSH dose was adjusted based on the size and  
104 number of developing follicles. Cetrotide (GnRH antagonist), was given daily by subcutaneous  
105 (SC) injection (0.25 mg/d) starting from day 7 of the stimulation cycle. Also, additional  
106 transvaginal ultrasounds were performed at days 8, 10 and 12 post-medications. Gonal-F and  
107 Cetrotide were administered continuously until at least two follicles reached  $\geq 18$  mm. GnRH  
108 agonist (Buserelin, Suprefact, Serono 0.5 ml SC) was given for triggering the final oocyte  
109 maturation. Serum concentrations of estradiol (E2), LH, and progesterone (P) were tested in the  
110 proband on the day of HCG administration. The hormones were determined using the Immulite  
111 Automated Analyser System (ECL2012, Siemens, Germany) as instructed. Oocytes were retrieved  
112 34-38 h after Buserelin injection and evaluated under an inverted microscope (Diaophot 300;  
113 Nikon, Japan) with an enlargement of 3400x.

114

115 ***In silico* analyses**

116 Template-based modeling was used to obtain a 3D structural model of cyclin-B3 protein, due to  
117 the lack of crystal structure for this protein. The isoform 1 of cyclin-B3 sequence was retrieved  
118 from the UniProt database (UniProt ID: Q8WWL7). Residues 1126-1388 of CCNB3 could be  
119 aligned to G2/mitotic-specific cyclin-B1 (CCNB1). A 3D-model of CCNB3 was built with  
120 SWISS-MODEL<sup>8</sup> using as templates 6gu2<sup>9</sup> or 2jgz<sup>10</sup> (chain B). The complexes of CCNB3 cyclin  
121 domain with CDK1 or CDK2 were built with the suite docking programs called pyDock<sup>11</sup> using  
122 as a receptor the structure of the kinase deposited in 6gu2 (chain A)<sup>9</sup> or 2jgz (chain A)<sup>10</sup>. No spatial  
123 or biological restrictions were used during simulations, which allowed a complete sampling of the  
124 docking landscape around the kinase. The interface of the complexes CCNB3 cyclin domain-  
125 CDK1 or CCNB3 cyclin domain-CDK2 with the lowest energy obtained with pyDOCK were  
126 analysed with the server PISA. The figure was prepared with UCSF Chimera<sup>12</sup>.

127 The effect of V1251D substitution on CCNB3 was determined with DynaMut<sup>13</sup>. DynaMut carries  
128 out normal mode analysis with Bio3D<sup>14</sup> and ENCoM<sup>15</sup> and evaluates the effect of mutation on  
129 protein dynamics and stability due to vibrational entropy changes. DynaMut also provides the  
130 results obtained by structural methods such as mCSM<sup>16</sup>, SDM<sup>17</sup>, and DUET<sup>18</sup>.

131 The alignment of orthologous cyclin B3 sequences was obtained by retrieving the sequences from  
132 the KEGG databank (ORTHOLOGY: K21771)<sup>19</sup> and aligning them using Clustal Omega<sup>20</sup>.

133

134 **URLS addresses for web resources used**135 1000 Genomes Project, <http://www.1000genomes.org/>136 ClinVar, <https://www.ncbi.nlm.nih.gov/clinvar/>

- 137 Clustal Omega, <https://www.ebi.ac.uk/Tools/msa/clustalo/>
- 138 ExAC Browser, <http://exac.broadinstitute.org/>
- 139 ExSQLibur pipeline, <https://github.com/tkaraouzene/ExSQLibur>
- 140 GenBank, <https://www.ncbi.nlm.nih.gov/genbank/>
- 141 GnomAD, <http://gnomad.broadinstitute.org/>
- 142 Mutation Taster, <http://www.mutationtaster.org>
- 143 NHLBI Exome Sequencing Project (ESP) Exome Variant
- 144 Server, <http://evs.gs.washington.edu/EVS/>
- 145 OMIM, <http://www.omim.org/>
- 146 PISA, [http://www.ebi.ac.uk/pdbe/prot\\_int/pistart.html](http://www.ebi.ac.uk/pdbe/prot_int/pistart.html)
- 147 PolyPhen-2, <http://genetics.bwh.harvard.edu/pph2>
- 148 PyDock, <https://life.bsc.es/pid/pydock/>
- 149 SIFT, <http://sift.jcvi.org/>

150

### 151 **Supplemental References**

- 152 1. Miller SA, Dykes DD, Polesky HF. A simple salting out procedure for extracting DNA from
- 153 human nucleated cells. *Nucleic Acids Res* 1988;16:1215.
- 154 2. Chomczynski, P. A reagent for the single-step simultaneous isolation of RNA, DNA and
- 155 proteins from cell and tissue samples. *BioTechniques* 1993;15, 532-537.
- 156 3. Barch MJ, Knutsen T, Spurbeck JL. The AGT cytogenetics laboratory manual. Philadelphia:
- 157 Lippincott-Raven Publishers 1997.
- 158 4. McGowan-Jordan J, Simons A, Schmid M. ISCN 2016: An International System for Human
- 159 Cytogenomic Nomenclature (2016). *Cytogenet Genome Res* 2016;149:Special issue 1–2.

- 160 5. Fischer AH, Jacobson KA, Rose J, Zeller R. Hematoxylin and eosin staining of tissue and cell  
161 sections. *CSH Protoc.* 2008;pdb.prot4986.
- 162 6. Sparago A, Verma A, Patricelli MG, Pignata L, Russo S, Calzari L, De Francesco N, Del Prete  
163 R, Palumbo O, Carella M, Mackay DJG, Rezwan FI, Angelini C, Cerrato F, Cubellis MV, Riccio  
164 A. The phenotypic variations of multi-locus imprinting disturbances associated with maternal-  
165 effect variants of NLRP5 range from overt imprinting disorder to apparently healthy phenotype.  
166 *Clinical Epigenetics* 2019;11:190.
- 167 7. Monk D, Mackay DJ, Eggermann T, Maher ER and Riccio A. Genomic imprinting disorders:  
168 lessons on how genome, epigenome and environment interact. *Nature Rev Genet* 2019;20:235-  
169 248.
- 170 8. Waterhouse A, Bertoni M, Bienert S, Studer G, Tauriello G, Gumienny R, Heer FT, de Beer  
171 TAP, Rempfer C, Bordoli L, Lepore R, Schwede T. Swiss-model: Homology modelling of protein  
172 structures and complexes. *Nucleic Acids Res* 2018;46:W296-W303.
- 173 9. Wood DJ, Korolchuk S, Tatum NJ, Wang LZ, Endicott JA, Noble MEM, Martin MP.  
174 Differences in the conformational energy landscape of cdk1 and cdk2 suggest a mechanism for  
175 achieving selective cdk inhibition. *Cell Chem Biol* 2019; 26:121-130.e5.
- 176 10. Brown NR, Lowe ED, Petri E, Skamnaki V, Antrobus R, Johnson LN. Cyclin B and cyclin A  
177 confer different substrate recognition properties on CDK2. *Cell Cycle* 2007;6:1350-1359.
- 178 11. Cheng TM, Blundell TL, Fernandez-Recio J. Electrostatics and desolvation for effective  
179 scoring of rigid-body protein–protein docking. *Proteins* 2007;68:503-515.
- 180 12. Pettersen EF, Goddard TD, Huang CC, Couch GS, Greenblatt DM, Meng EC, Ferrin TE.  
181 Ucsf chimera--a visualization system for exploratory research and analysis. *J Comput Chem*  
182 2004;25:1605-1612.



- 183 13. Rodrigues CH, Pires DE, Ascher DB. DynaMut: predicting the impact of mutations on protein  
184 conformation, flexibility and stability. *Nucleic Acids Res* 2018;46:W350–W355.
- 185 14. Grant BJ, Rodrigues AP, ElSawy KM, McCammon JA, Caves LS. Bio3d: an R package for  
186 the comparative analysis of protein structures. *Bioinformatics* 2006;22:2695–2696.
- 187 15. Frappier V, Najmanovich RJ. A Coarse-Grained Elastic Network Atom Contact Model and Its  
188 Use in the Simulation of Protein Dynamics and the Prediction of the Effect of Mutations. *PLoS*  
189 *Comput Biol* 2014;10:e1003569.
- 190 16. Pires DE, Ascher DB, Blundell TL. mCSM: predicting the effects of mutations in proteins  
191 using graph-based signatures. *Bioinformatics* 2014;30,335–342.
- 192 17. Pandurangan AP, Ochoa-Montaña B, Ascher DB, Blundell TL. SDM: a server for predicting  
193 effects of mutations on protein stability. *Nucleic Acids Research* 2017;45:W229–W235.
- 194 18. Pires DE, Ascher DB, Blundell TL. DUET: a server for predicting effects of mutations on  
195 protein stability using an integrated computational approach. *Nucleic Acids Res* 2014;42:W314–  
196 W319.
- 197 19. Kanehisa M, Sato Y, Kawashima M, Furumichi M, and Tanabe M. KEGG as a reference  
198 resource for gene and protein annotation. *Nucleic Acids Res* 2016;44:D457–D462.
- 199 20. Sievers F, Higgins DG. Clustal Omega, accurate alignment of very large numbers of sequences.  
200 *Methods Mol Biol* 2014;1079:105–116.

201

202

203

204 **Legends to Supplementary Figures**

205 **Supplementary Figure 1 Analysis of genomic integrity and histopathological features.** (A)  
206 Karyotype of II-5. (B) Karyotype of II-6. (C) Karyotype of II-7. (D) Karyotype of II-8. (E) Log<sub>2</sub>  
207 intensity ratios of all chromosomes of II-5 revealed by aCGH analysis. (F) Log<sub>2</sub> intensity ratios  
208 of all chromosomes of II-6 revealed by aCGH analysis. (G) Log<sub>2</sub> intensity ratios of all  
209 chromosomes of II-8 (upper profile) and II-7 (lower profile) revealed by SNP-array analysis. (H)  
210 Log<sub>2</sub> intensity ratios of all chromosomes of III-12 revealed by aCGH analysis. (J) Histological  
211 analysis of tissue from III-12. Hematoxylin & Eosin x 40.

212

213 **Supplementary Figure 2 Assessment of imprinted DNA methylation.** Pyrosequencing  
214 quantification of the paternally methylated DMRs *H19/IGF2:IG-DMR* and *MEG3:TSS-DMR* (A)  
215 and the maternally methylated DMRs *KCNQ1OT1:TSS-DMR*, *MEST:alt-TSS-DMR*,  
216 *PLAGL1:alt-TSS-DMR*, *GNAS-AS1:TSS-DMR* and *GRB10:alt-TSS-DMR* (B). Reported data are  
217 the mean of at least two independent PCR and pyrosequencing experiments. P-values were  
218 calculated by two-tailed Student's T-test (\* =  $P \leq 0.05$ ; \*\*\* =  $P \leq 0.005$ ). Statistics is reported in  
219 Supplementary Table 2.

220

221 **Supplementary Figure 3 Alignment of orthologous cyclin B3 sequences in placental**  
222 **mammals around human CCNB3 Val1251.** Protein sequences derived were retrieved from the  
223 KEGG databank (ORTHOLOGY: K21771) and aligned using Clustal Omega. Human Valine 1251  
224 and its conservative replacement Threonine in orthologs are highlighted. MACFA, *Macaca*  
225 *fascicularis*; PHYMC, *Physeter microcephalus*; DELLE, *Delphinapterus leucas*; BALA,  
226 *Balaenoptera acutorostrata scammoni*; RAT, *Rattus norvegicus*; HORSE, *Equus caballus*;

227 MOUSE, *Mus musculus*; TRIMA, *Trichechus manatus*; URSMA, *Ursus maritimus*; URSAR,  
228 *Ursus arctos*; ENHLU, *Enhydra lutris*; LIPVE, *Lipotes vexillifer*; PIG, *Sus scrofa*; ODORO,  
229 *Odobenus rosmarus divergens*; VULVU, *Vulpes vulpes*; CANLF, *Canis lupus familiaris*.

230

231 **Supplementary Figure 4 In silico docking of CCNB3 model onto CDK1 and CDK2. (A)**

232 Model of CCNB3-CDK1 complex. CDK1 is in cyan, the lowest energy pose of CCNB3 docked  
233 onto CDK1 is in yellow, two further low energy poses of CCNB3 docked onto CDK1 are in light  
234 and dark gray. As a control, the experimentally determined pose of CCNB1 on CDK1 (pdb entry  
235 6gu2), is shown in green. **(B)** Model of CCNB3-CDK2 complex. CDK2 is in blue, the lowest  
236 energy pose of CCNB3 docked onto CDK2 is in pink, two further low energy poses of CCNB3  
237 docked onto CDK2 are in light and dark gray. As a control, the experimentally determined pose  
238 of CCNB1 on CDK2 (pdb entry 2jgz) is shown in purple.

239

240 **Supplementary Tables.**

241 **Supplementary Table 1 Summary of clinical data of II-6 and II-7.**

242 **Supplementary Table 2 Statistics of methylation analysis.**

243 **Supplementary Table 3 Segregation of polymorphic STS markers.**

244 **Supplementary Table 4 Called homozygous variants in II-6 and II-7.**

245 **Supplementary Table 5 Primer sequences.**

246

247 **Supplementary Data Script of the bioinformatics pipeline used.**

248

**A**

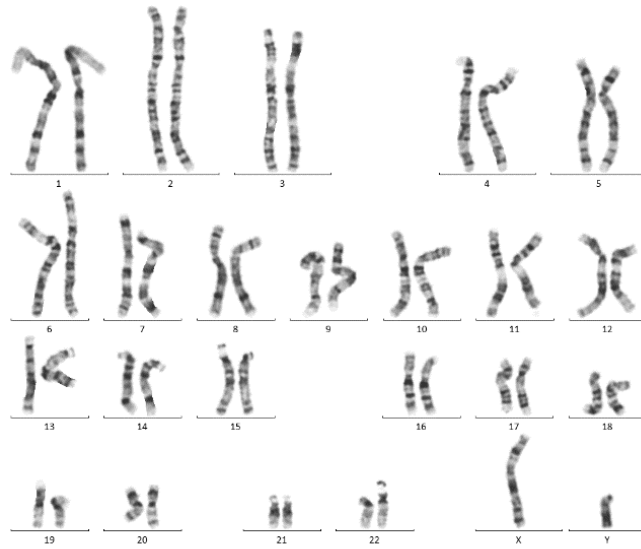

**B**

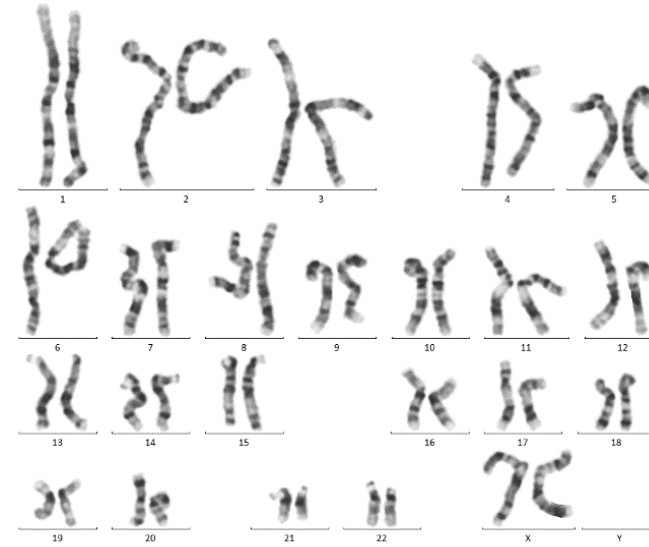

**C**

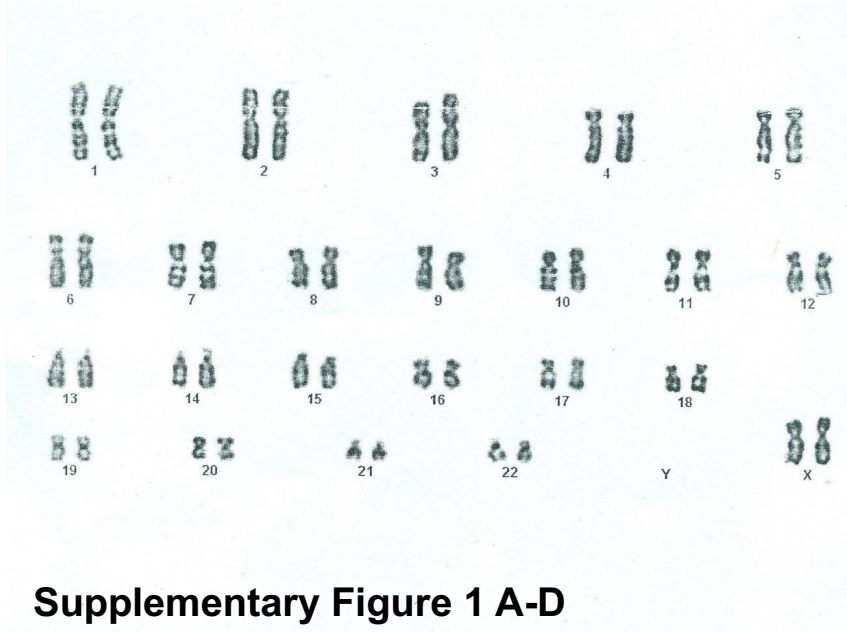

**D**

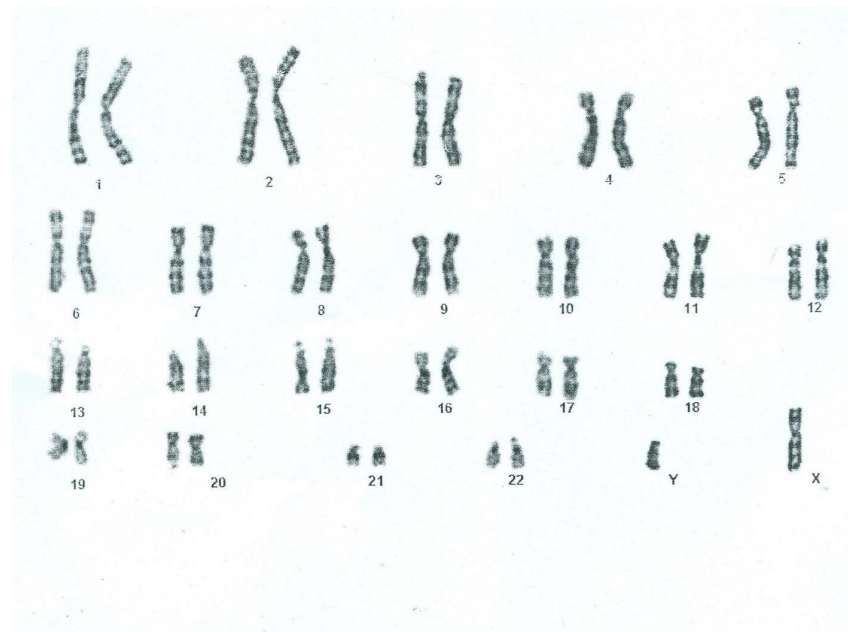

**Supplementary Figure 1 A-D**

**E**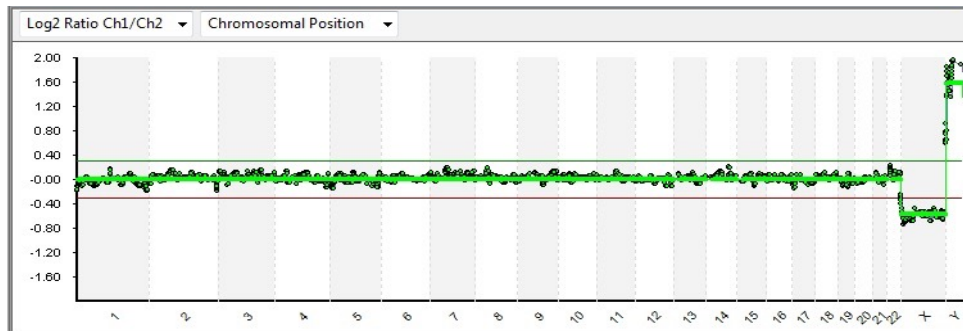**F**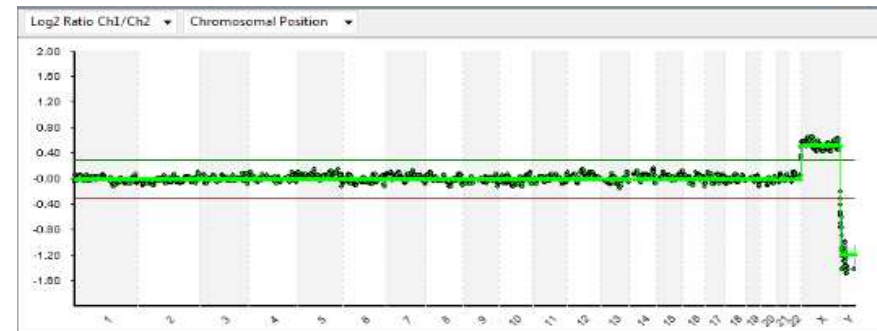**Supplementary Figure 1 E-F**

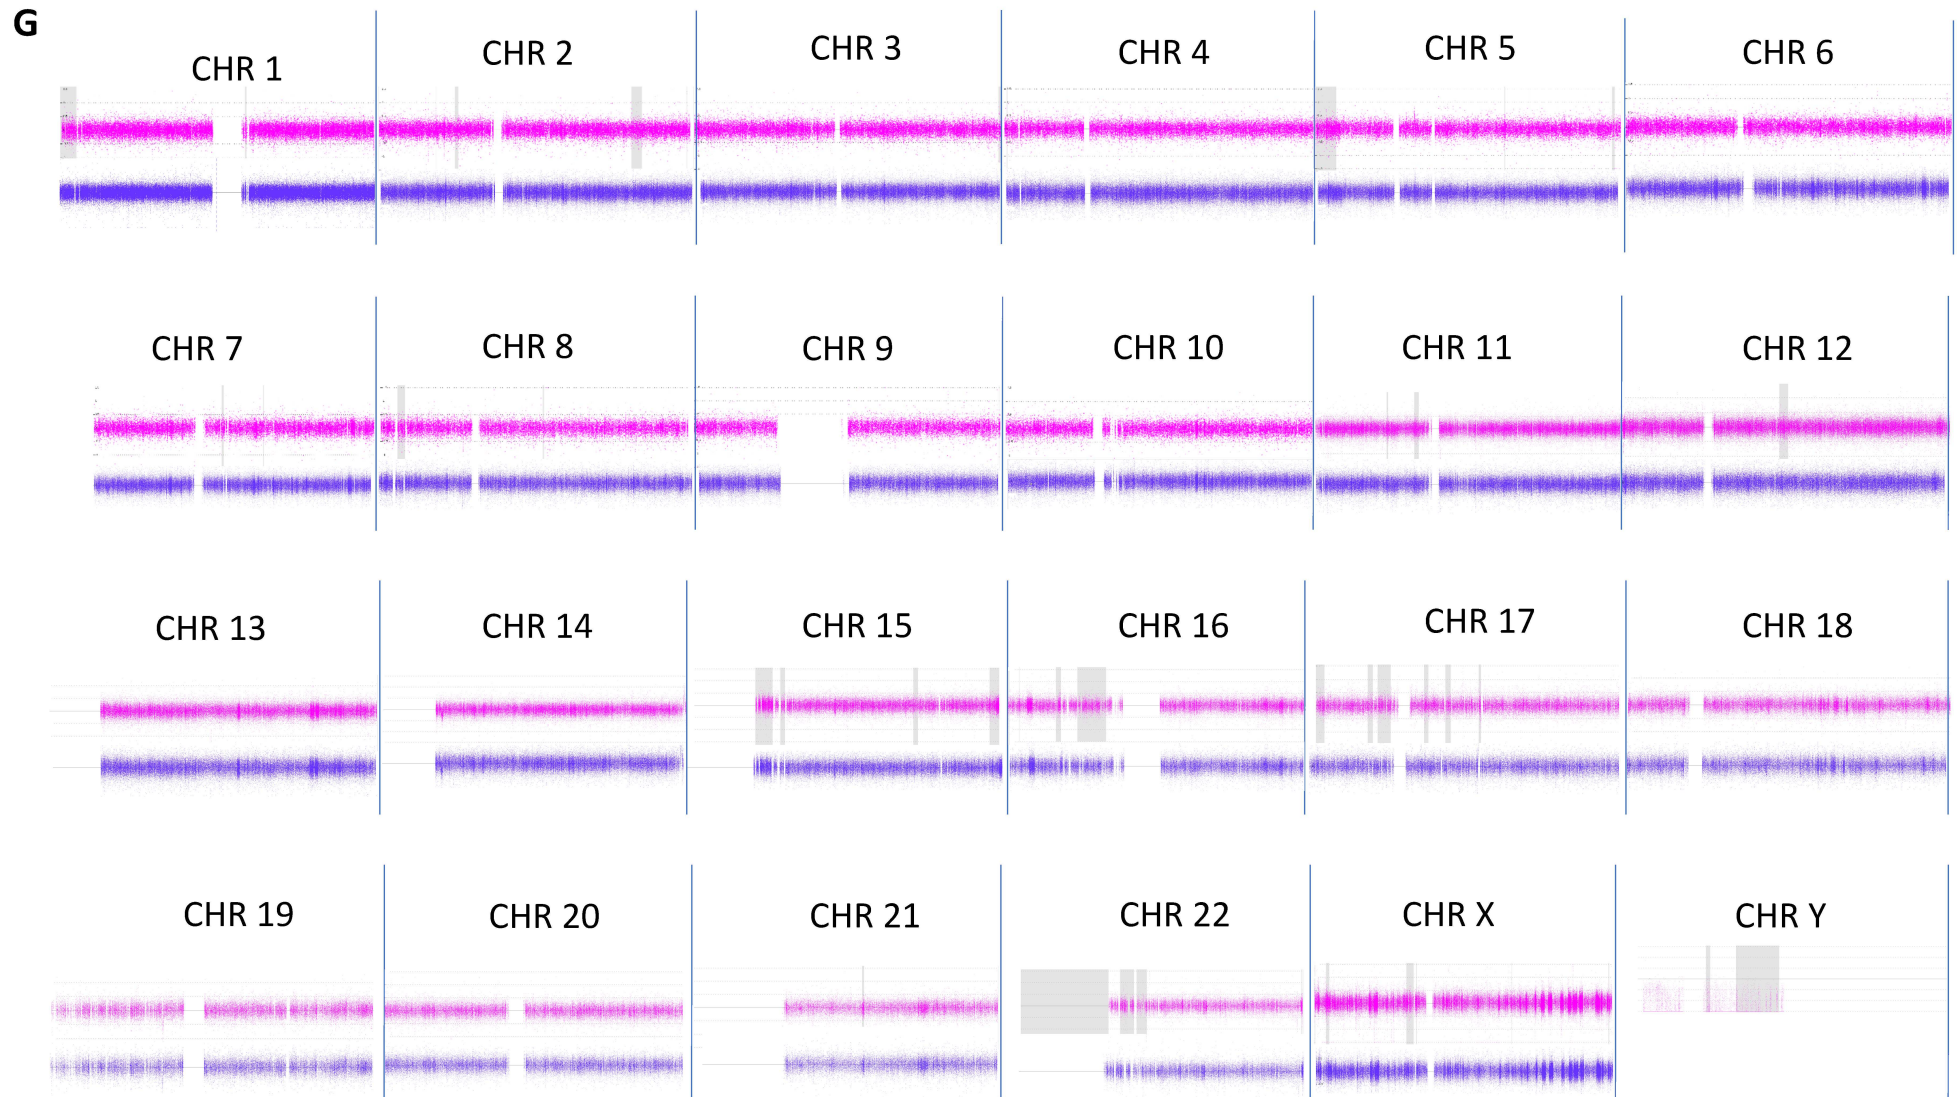

**Supplementary Figure 1 G**

**H**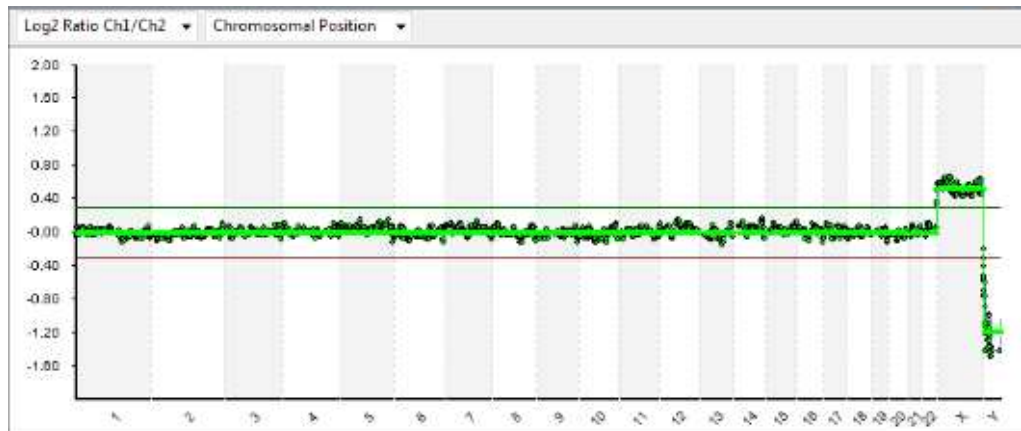**J**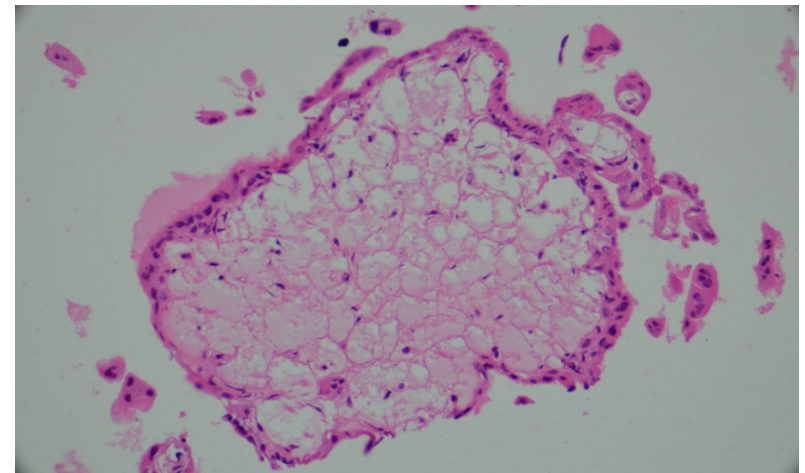**Supplementary Figure 1 H-J**

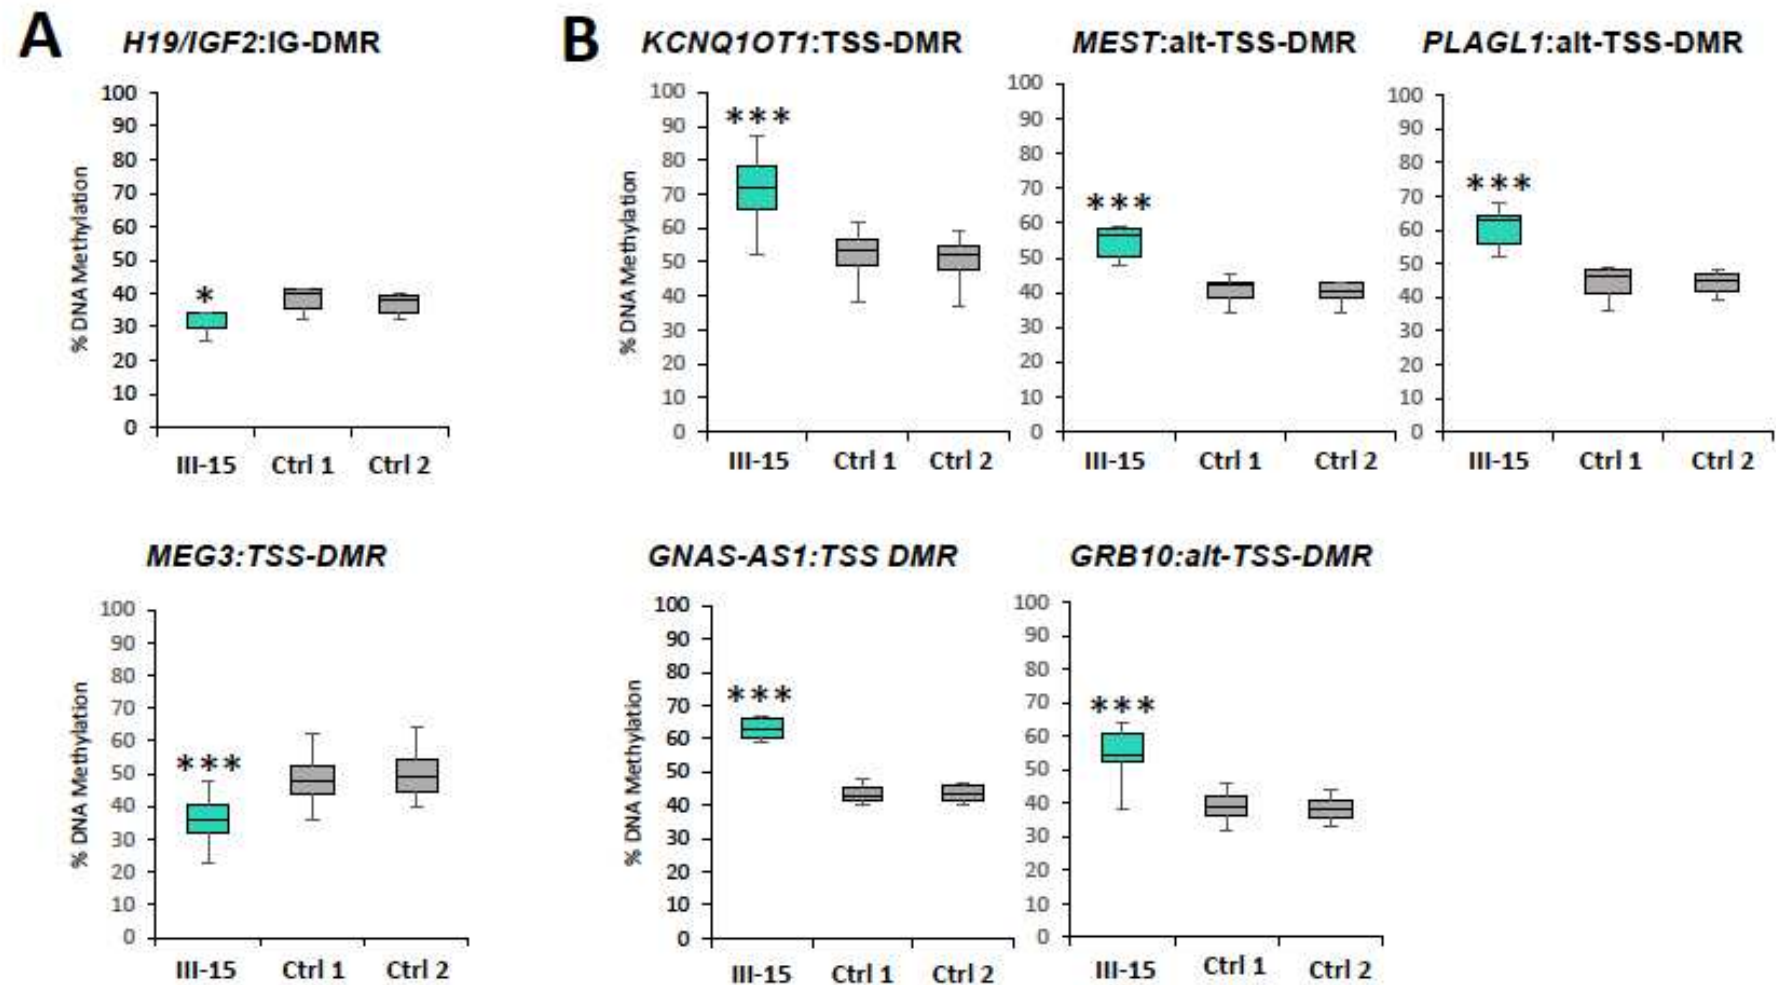

Supplementary Figure 2



|                  |                                                        |
|------------------|--------------------------------------------------------|
| CCNB3_HUMAN      | EHNSPRVDDFVYICDDNYQRSEVLSMEINILNVLKCDINIPIAYHFLRRYARC  |
| A0A2K5V9G9_MACFA | EHHPPCVDDFVYICDDNYQRSEVLSMEINILNVLKFDINIPVAYHFLRRYARC  |
| A0A2Y9S8S0_PHYMC | EPCPPCVDDFLYICDDIYKRDEMLAMEISILNLTLKFDINIPIAYHFLRRYAKC |
| A0A2Y9MQS0_DELLE | EPSPPCVDDFLYICDDIYKRDEMLAMEISILKTLKFDINIPIAYHFLRRYAKC  |
| A0A452CHG3_BALAS | EPCPPCVDDFLYICDDMYKRDEMLAMENSILKTLKFDINIPIAYHFLRRYAKC  |
| F1LVT0_RAT       | ESYPPSLTEFLYICEDLYPKSEMVSLEARNILKTLNFDINIPIAYHFLRRYASC |
| K4Q4R0_HORSE     | EPCPPCVDDFLYICDDIYQRNEMLTMEISILQTLKFDINIPIAYHFLRRYARC  |
| A2AEP2_MOUSE     | ESYPPSLSEFLFICEDMYEKSDMVSLESSILQTLNFDINIPIAYHFLRRYASC  |
| A0A2Y9R2A8_TRIMA | ETCPCVDDFLYICDDIYQRDEVLAMEISILKTLKFDINIPIAYHFLRRYARC   |
| A0A384C062_URSMA | ESCPCVDDFLYICDDIYQRDEMLTMEISILQTLKFDINIPIAYHFLRRYARC   |
| A0A3Q7W806_URSAR | ESCPCVDDFLYICDDIYQRDEMLTMEISILQTLKFDINIPIAYHFLRRYARC   |
| A0A2Y9JRE8_ENHLU | ESCPCVDDFLYICDDIYQRDEMLTMEISILQTLKFDINIPIAYHFLRRYARC   |
| A0A340WN80_LIPVE | EPSPPCVDDFLYICDDIYKRDEMLAMEISILKTLKFDINIPIAYHFLRRYAKC  |
| A0A4X1SQD0_PIG   | EPCPPCVDDFLYICDDIYKRDEMLAMEIRILHTEFLDINIPIAYHFLRRYARC  |
| A0A2U3ZC98_ODORO | ESYPPCVDDFLYICDDIYQRDEMLTMEISILQTLKFDINIPIAYHFLRRYARC  |
| A0A3Q7QYB9_VULVU | EPCPPCVDDFLYICDDIYQRHEMLSMEISILQTLKFDINIPIAYHFLRRYARC  |
| CCNB3_CANLF      | EPCPPCVDDFLYICDDIYQRHEMLSMEISILQTLKFDINIPIAYHFLRRYARC  |

### Supplementary Figure 3

**A**

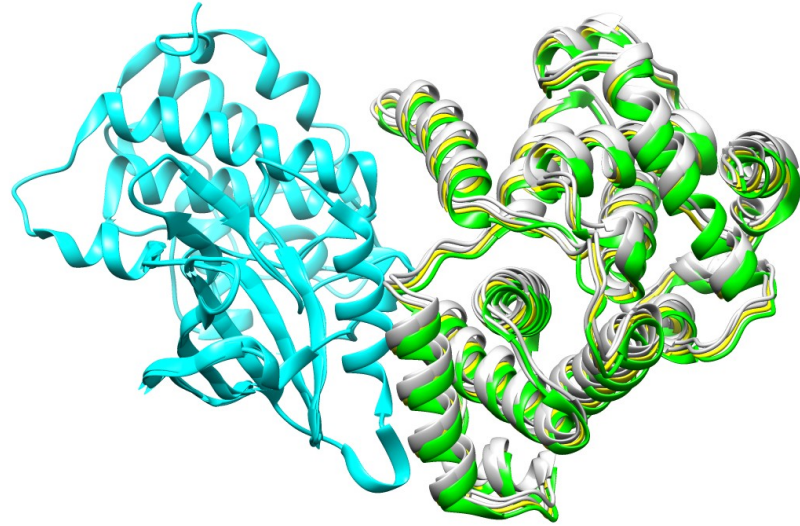

**B**

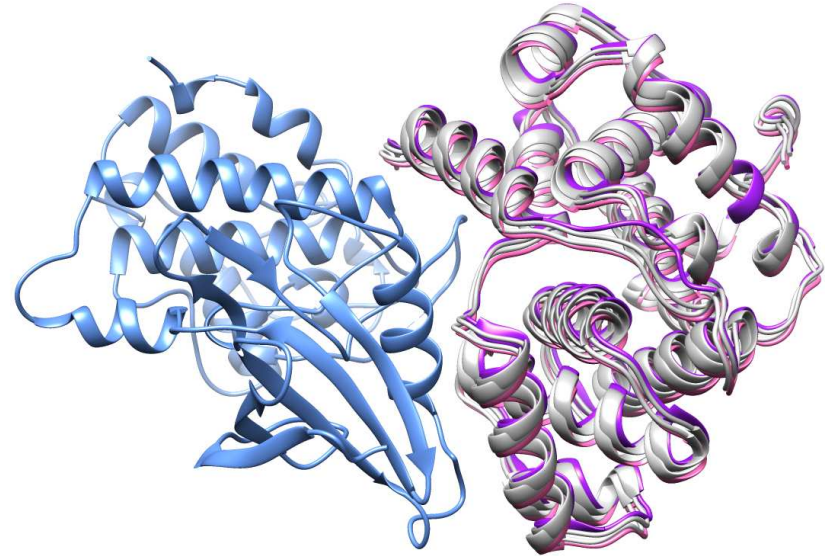

## Supplementary Figure 4

**Supplementary Table 1** Summary of clinical data of II-6 and II-7

|                                   | <b>Test</b>                    | <b>Result II-6</b> | <b>Result II-7</b> | <b>Normal Range</b>  |
|-----------------------------------|--------------------------------|--------------------|--------------------|----------------------|
| <b>Coagulation Analysis</b>       | Activated Protein C Resistance | 3.3                | 3.9                | Negative: $\geq 2.9$ |
|                                   | Prothrombin Time               | 12 (Sec)           | 13.5 (Sec)         | 11.0-14              |
|                                   | Homocystein                    | 7                  | 9                  | 5-15                 |
|                                   | Lupus Anti- Coagulant          | Negative           | Negative           | Negative             |
|                                   | Anti-Thrombin III level        | 112                | 95                 | 80-125               |
|                                   | Protein C                      | 137                | 107                | 70- 150              |
|                                   | Protein S                      | 145                | 95                 | 60-150               |
| <b>Hormone Analysis</b>           | TSH                            | 2.1 mIU/Lit        | 2.9 mIU/Lit        | 0.27-4.2             |
|                                   | Anti- Mullerian Hormone        | 1.5 ng/ml          | 2.1 ng/ml          | 0.6-7.7              |
| <b>Immunological Analysis</b>     | Anti-Thyroid Peroxidase        | 17                 | 24                 | 0-35.0               |
|                                   | Anti- Thyroglobulin Ab         | 81.9               | 100.7              | 0-115                |
|                                   | Anti Beta2 Glycoprotein        | 1.1                | 0.9                | Negative: $\leq 10$  |
|                                   | Anti- Cardiolipin Antibody     | 0.8                | 0.5                | Normal: $\leq 12$    |
| <b>Microbiological Analysis</b>   | Anti- HCV                      | Negative           | -                  | Negative             |
|                                   | Anti-HIV I&II                  | Negative           | Negative           | Negative             |
|                                   | HBsAg                          | Negative           | Negative           | Negative             |
|                                   | Rubella IgG and IgM            | Negative           | -                  | Negative             |
|                                   | VDRL                           | Negative           | -                  | Negative             |
| <b>Pelvic Ultrasound Analysis</b> |                                | Normal             | -                  | Normal               |

Supplementary table 2 Statistics of methylation analysis

|                       |             | H19/IGF2:IG-DMR |             |             |             |             |
|-----------------------|-------------|-----------------|-------------|-------------|-------------|-------------|
| Samples               |             | 1° CG           | 2° CG       | 3° CG       | 4° CG       | 5° CG       |
| t-test<br>0,017068426 | Mean(r1,r2) | Mean(r1,r2)     | Mean(r1,r2) | Mean(r1,r2) | Mean(r1,r2) | Mean(r1,r2) |
|                       | III-15      | 33              | 34          | 26          | 34          | 34          |
|                       | Ctrl1       | 39              | 41          | 32          | 41          | 40          |
|                       | Ctrl2       | 40              | 38          | 32          | 39          | 37          |

  

|                       |             | KCNQ1OT1:TSS-DMR |             |             |             |             |             |             |             |             |             |             |             |
|-----------------------|-------------|------------------|-------------|-------------|-------------|-------------|-------------|-------------|-------------|-------------|-------------|-------------|-------------|
| Samples               |             | 1° CG            | 2° CG       | 3° CG       | 4° CG       | 5° CG       | 6° CG       | 7° CG       | 8° CG       | 9° CG       | 10° CG      | 11° CG      | 12° CG      |
| t-test<br>0,000277275 | Mean(r1,r2) | Mean(r1,r2)      | Mean(r1,r2) | Mean(r1,r2) | Mean(r1,r2) | Mean(r1,r2) | Mean(r1,r2) | Mean(r1,r2) | Mean(r1,r2) | Mean(r1,r2) | Mean(r1,r2) | Mean(r1,r2) | Mean(r1,r2) |
|                       | III-15      | 70               | 65          | 76          | 65          | 61          | 87          | 78          | 52          | 71          | 78          | 79          | 73          |
|                       | Ctrl1       | 53               | 50          | 54          | 49          | 46          | 62          | 57          | 38          | 51          | 56          | 59          | 55          |
|                       | Ctrl2       | 52               | 48          | 53          | 48          | 44          | 58          | 55          | 37          | 49          | 53          | 59          | 52          |

  

|                       |             | MEST:alt-TSS-DMR |             |             |             |             |             |             |             |
|-----------------------|-------------|------------------|-------------|-------------|-------------|-------------|-------------|-------------|-------------|
| Samples               |             | 1° CG            | 2° CG       | 3° CG       | 4° CG       | 5° CG       | 6° CG       | 7° CG       | 8° CG       |
| t-test<br>4,66124E-06 | Mean(r1,r2) | Mean(r1,r2)      | Mean(r1,r2) | Mean(r1,r2) | Mean(r1,r2) | Mean(r1,r2) | Mean(r1,r2) | Mean(r1,r2) | Mean(r1,r2) |
|                       | III-15      | 59               | 56          | 59          | 48          | 51          | 57          | 57          | 50          |
|                       | Ctrl1       | 43               | 42          | 43          | 34          | 38          | 42          | 45          | 39          |
|                       | Ctrl2       | 43               | 41          | 43          | 34          | 38          | 40          | 42          | 39          |

  

|                       |             | MEG3:TSS-DMR |             |             |             |             |             |             |             |
|-----------------------|-------------|--------------|-------------|-------------|-------------|-------------|-------------|-------------|-------------|
| Samples               |             | 1° CG        | 2° CG       | 3° CG       | 4° CG       | 5° CG       | 6° CG       | 7° CG       | 8° CG       |
| t-test<br>0,001263129 | Mean(r1,r2) | Mean(r1,r2)  | Mean(r1,r2) | Mean(r1,r2) | Mean(r1,r2) | Mean(r1,r2) | Mean(r1,r2) | Mean(r1,r2) | Mean(r1,r2) |
|                       | III-15      | 35           | 48          | 37          | 35          | 23          | 41          | 31          | 40          |
|                       | Ctrl1       | 46           | 62          | 50          | 46          | 36          | 50          | 43          | 53          |
|                       | Ctrl2       | 46           | 64          | 52          | 48          | 40          | 50          | 44          | 55          |

  

|                       |             | GRB10:alt-TSS-DMR |             |             |             |             |             |             |             |             |             |             |             |             |             |
|-----------------------|-------------|-------------------|-------------|-------------|-------------|-------------|-------------|-------------|-------------|-------------|-------------|-------------|-------------|-------------|-------------|
| Samples               |             | 1° CG             | 2° CG       | 3° CG       | 4° CG       | 5° CG       | 6° CG       | 7° CG       | 8° CG       | 9° CG       | 10° CG      | 11° CG      | 12° CG      | 13° CG      | 14° CG      |
| t-test<br>5,33651E-07 | Mean(r1,r2) | Mean(r1,r2)       | Mean(r1,r2) | Mean(r1,r2) | Mean(r1,r2) | Mean(r1,r2) | Mean(r1,r2) | Mean(r1,r2) | Mean(r1,r2) | Mean(r1,r2) | Mean(r1,r2) | Mean(r1,r2) | Mean(r1,r2) | Mean(r1,r2) | Mean(r1,r2) |
|                       | III-15      | 54                | 51          | 60          | 55          | 64          | 62          | 63          | 44          | 38          | 53          | 54          | 55          | 54          | 58          |
|                       | Ctrl1       | 37                | 34          | 41          | 37          | 46          | 45          | 45          | 35          | 32          | 39          | 39          | 39          | 39          | 40          |
|                       | Ctrl2       | 37                | 35          | 40          | 36          | 44          | 42          | 42          | 35          | 33          | 38          | 37          | 38          | 38          | 39          |

  

|                       |             | PLAGL1:alt-TSS-DMR |             |             |             |             |             |             |             |             |             |             |
|-----------------------|-------------|--------------------|-------------|-------------|-------------|-------------|-------------|-------------|-------------|-------------|-------------|-------------|
| Samples               |             | 1° CG              | 2° CG       | 3° CG       | 4° CG       | 5° CG       | 6° CG       | 7° CG       | 8° CG       | 9° CG       | 10° CG      | 11° CG      |
| t-test<br>3,25409E-07 | Mean(r1,r2) | Mean(r1,r2)        | Mean(r1,r2) | Mean(r1,r2) | Mean(r1,r2) | Mean(r1,r2) | Mean(r1,r2) | Mean(r1,r2) | Mean(r1,r2) | Mean(r1,r2) | Mean(r1,r2) | Mean(r1,r2) |
|                       | III-15      | 62                 | 64          | 64          | 52          | 68          | 63          | 58          | 56          | 52          | 63          | 67          |
|                       | Ctrl1       | 46                 | 48          | 48          | 39          | 49          | 46          | 44          | 41          | 36          | 45          | 47          |
|                       | Ctrl2       | 45                 | 46          | 47          | 39          | 48          | 47          | 44          | 42          | 39          | 45          | 48          |

  

|                       |             | GNAS-AS1:TSS-DMR |             |             |             |             |             |             |             |
|-----------------------|-------------|------------------|-------------|-------------|-------------|-------------|-------------|-------------|-------------|
| Samples               |             | 1° CG            | 2° CG       | 3° CG       | 4° CG       | 5° CG       | 6° CG       | 7° CG       | 8° CG       |
| t-test<br>6,02372E-09 | Mean(r1,r2) | Mean(r1,r2)      | Mean(r1,r2) | Mean(r1,r2) | Mean(r1,r2) | Mean(r1,r2) | Mean(r1,r2) | Mean(r1,r2) | Mean(r1,r2) |
|                       | III-15      | 60               | 59          | 64          | 67          | 60          | 62          | 66          | 66          |
|                       | Ctrl1       | 41               | 40          | 43          | 46          | 42          | 43          | 48          | 44          |
|                       | Ctrl2       | 40               | 41          | 43          | 46          | 43          | 44          | 47          | 46          |

|                    | Q1    | MEDIAN | Q3    | Q3-Q1 | Min | Max | Upper whisker | II-I | III-II | Lower whisker |
|--------------------|-------|--------|-------|-------|-----|-----|---------------|------|--------|---------------|
| H19/IGF2           | 29,5  | 34     | 34    | 4,5   | 26  | 34  | 3,5           | 4,5  | 0      | 0             |
| H19/IGF2           | 35,5  | 40     | 41    | 5,5   | 32  | 41  | 3,5           | 4,5  | 1      | 0             |
| H19/IGF2           | 34,5  | 38     | 39,5  | 5     | 32  | 40  | 2,5           | 3,5  | 1,5    | 0,5           |
| KCNQ1OT1           | 65,25 | 72     | 78    | 12,75 | 52  | 87  | 13,25         | 6,75 | 6      | 9             |
| KCNQ1OT1           | 49,25 | 53,5   | 56,75 | 7,5   | 38  | 62  | 11,25         | 4,25 | 3,25   | 5,25          |
| KCNQ1OT1           | 48    | 52     | 54,5  | 6,5   | 37  | 59  | 11            | 4    | 2,5    | 4,5           |
| MEST:alt-TSS-DMR   | 50,25 | 56,5   | 58,5  | 8,25  | 48  | 59  | 2,25          | 6,25 | 2      | 0,5           |
| MEST:alt-TSS-DMR   | 38,25 | 42     | 43    | 4,75  | 34  | 45  | 4,25          | 3,75 | 1      | 2             |
| MEST:alt-TSS-DMR   | 38,25 | 40,5   | 42,75 | 4,5   | 34  | 43  | 4,25          | 2,25 | 2,25   | 0,25          |
| MEST:alt-TSS-DMR   | 32    | 36     | 40,75 | 8,75  | 23  | 46  | 9             | 4    | 4,75   | 7,25          |
| MEST:alt-TSS-DMR   | 43,75 | 48     | 52,25 | 8,5   | 36  | 62  | 7,75          | 4,25 | 4,25   | 9,75          |
| MEST:alt-TSS-DMR   | 44,5  | 49     | 54,25 | 9,75  | 40  | 64  | 4,5           | 4,5  | 5,25   | 9,75          |
| GRB10:alt-TSS-DMR  | 52,5  | 54,5   | 60,5  | 8     | 38  | 64  | 14,5          | 2    | 6      | 3,5           |
| GRB10:alt-TSS-DMR  | 36,5  | 39     | 42    | 5,5   | 32  | 46  | 4,5           | 2,5  | 3      | 4             |
| GRB10:alt-TSS-DMR  | 35,75 | 38     | 40,5  | 4,75  | 33  | 44  | 2,75          | 2,25 | 2,5    | 3,5           |
| PLAGL1:alt-TSS-DMR | 56    | 63     | 64    | 8     | 52  | 68  | 4             | 7    | 1      | 4             |
| PLAGL1:alt-TSS-DMR | 41    | 46     | 48    | 7     | 36  | 49  | 5             | 5    | 2      | 1             |
| PLAGL1:alt-TSS-DMR | 42    | 45     | 47    | 5     | 39  | 48  | 3             | 3    | 2      | 1             |
| GNAS-AS1           | 60    | 63     | 66    | 6     | 59  | 67  | 1             | 3    | 3      | 1             |
| GNAS-AS1           | 41,25 | 43     | 45,5  | 4,25  | 40  | 48  | 1,25          | 1,75 | 2,5    | 2,5           |
| GNAS-AS1           | 41,5  | 43,5   | 46    | 4,5   | 40  | 47  | 1,5           | 2    | 2,5    | 1             |

**Supplementary Table 3** Segregation of polymorphic STSs

| Marker   | Chr | Cytoband   | Distance from cen (bp) | II-7 | III-12     | III-15     | II-8 | Triploidy origin         |
|----------|-----|------------|------------------------|------|------------|------------|------|--------------------------|
| D1S498   | 1   | 1q21.3     | 26766062               | bb   | abb        | abb        | ab   | uninformative            |
| TPOX     | 2   | 2p25.3     | 91806632               | ab   | <u>aab</u> | abc        | bc   | mat in III-12            |
| D5S630   | 5   | 5p15.31    | 36844678               | ad   | <u>acd</u> | <u>acd</u> | bc   | mat in III-12 and III-15 |
| D5S818   | 5   | 5q23.2     | 73705541               | ab   | <u>abb</u> | abc        | ac   | mat in III-12            |
| D5S400   | 5   | 5q34       | 119037229              | ac   | <u>abc</u> | <u>aab</u> | bb   | mat in III-12 and III-15 |
| D6S460   | 6   | 6q14.1     | 18520678               | ab   | <u>bbc</u> | <u>aad</u> | cd   | mat in III-12 and III-15 |
| D7S820   | 7   | 7q11.21-22 | 23789458               | ab   | abc        | abc        | bc   | Uninformative            |
| D9S1874  | 9   | 9p13.2     | 10145414               | cd   | NA         | <u>bdd</u> | ab   | mat in III-15            |
| D10S1790 | 10  | 10q21.1    | 12950376               | bc   | NA         | <u>abb</u> | aa   | mat in III-15            |
| D13S317  | 13  | 13q22-q31  | 63722123               | ab   | aab        | bbb*       | ab   | Uninformative            |
| D16S539  | 16  | 16q24.1    | 49786271               | ac   | <u>abc</u> | <u>bcc</u> | bb   | mat in III-12 and III-15 |
| D19S865  | 19  | 19p13,2    | 15503440               | bd   | <u>cdd</u> | <u>bcd</u> | ac   | mat in III-12 and III-15 |

STS alleles are indicated for each individual by a letter with 'a' being the largest amplicon. Alleles are underlined if maternal origin is evident. mat, maternal; NA, not assessed. \*only one type of allele is evident.

**Supplementary Table 4** Called homozygous variants in II-6 and II-7.

| <b>POSITION<br/>(hg38)</b> | <b>REF</b> | <b>ALT</b> | <b>Consequence</b> | <b>IMPACT</b> | <b>SYMBOL</b> | <b>Feature</b>    | <b>SIFT</b> | <b>PolyPhen</b>      | <b>Exac-AF</b> | <b>gnomAD_AF</b> |
|----------------------------|------------|------------|--------------------|---------------|---------------|-------------------|-------------|----------------------|----------------|------------------|
| chrX:67545316              | TGCA       | T          | inframe_deletion   | MODERATE      | AR            | ENST00000374690   | NA          | NA                   | NA             | NA               |
| chrX:50346749              | T          | A          | missense_variant   | MODERATE      | CCNB3         | ENST00000376042.6 | deleterious | probably<br>damaging | NA             | NA               |

**Supplementary Table 5** Primer sequences

| <b>Primer</b>           | <b>Sequence (5'-3')</b>             |
|-------------------------|-------------------------------------|
| CCNB3 (F)               | GTGGTTCTCAGAGGGCAGAT                |
| CCNB3 (R)               | TGACCTCCCTTGTAACCAATAC              |
| H19/IGF2:IG-DMR (F)     | bio-GTGGTTTTTATGACTGTTTTATTTTTGATGA |
| H19/IGF2:IG-DMR (R)     | ACTTCCCCTTCAATCTCACCA               |
| H19/IGF2:IG-DMR (seq)   | TACAAAATTAATTATAACTATAAAAT          |
| MEG3:TSS-DMR (F)        | bio-GTTTATTTAAGAGGGAATAGTTTTGAGAT   |
| MEG3:TSS-DMR (R)        | CCTCTCTCTCCATCCTACTCA               |
| MEG3:TSS-DMR (seq)      | AAAACCACTAAAAATCAACT                |
| KCNQ1OT1:TSS-DMR (F)    | GGAGAGTATTGTTTAGGTTAGGTTGTAT        |
| KCNQ1OT1:TSS-DMR (R)    | bio-CCTCCCCATCTCTCTAAAAAAATTTAA     |
| KCNQ1OT1:TSS-DMR (seq)  | GGTTAGGTTGTATTGTTG                  |
| MEST:alt-TSS DMR (F)    | bio-AATAAAGGGGTTTTGTTTTTTAAT        |
| MEST:alt-TSS DMR (R)    | AACCCACCACCAAATAAT                  |
| MEST:alt-TSS DMR (seq)  | TAACCACTATAACCAAATTAC               |
| PLAGL1:TSS-DMR (F)      | GTTAAGTGGTAGGAGGAGGTTT              |
| PLAGL1:TSS-DMR (R)      | bio-CTATACCTAAACCACCTTAACCTTACCC    |
| PLAGL1:TSS-DMR (seq)    | GGTAGGAGGAGGTTT                     |
| GNAS-AS1:TSS-DMR (F)    | TAGGTTGTAGTGGGGTTAAAGGA             |
| GNAS-AS1:TSS-DMR (R)    | bio-CTATACCTAAACCACCTTAACCTTACCC    |
| GNAS-AS1:TSS-DMR (seq)  | GGTAGGAGGAGGTTT                     |
| GRB10:alt-TSS-DMR (F)   | bio-GGTAGGGGTTTTTGTAGTTTG           |
| GRB10:alt-TSS-DMR (R)   | CTCTCAAATACTCAAATAAACTC             |
| GRB10:alt-TSS-DMR (seq) | CAAATACTCAAATAAACTCC                |
| D1S498 (F)              | TTGCTGAAGGGACATAGTG                 |
| D1S498 (R)              | TGCTGGGTATATCCAATATC                |
| TPOX (F)                | CACTAGCACCCAGAACCGTC                |
| TPOX (R)                | CCTTGTCAGCGTTTATTTGCC               |
| D4S405 (F)              | ATCAGGAGATGTTGCCTTGC                |
| D4S405 (R)              | CAGGGCTATGATTGGATGTC                |
| D4S428 (F)              | TAAGAGGCTCGAACAACACTACT             |
| D4S428 (R)              | CCAGCATTGGACTCTAAAGAA               |
| D5S818 (F)              | GGGTGATTTTCCTCTTTGGT                |
| D5S818 (R)              | TGATTCCAATCATAGCCACA                |

|              |                            |
|--------------|----------------------------|
| D5S1969 (F)  | AGGGAACCTCACCTGG           |
| D5S1969 (R)  | GACAAGGGCTGGGATG           |
| D5S630 (F)   | CATGACGATGTGGGCAG          |
| D5S630 (R)   | CCTTTCAGTGTAGAAGTGTGTGTGT  |
| D5S400 (F)   | GCCTGGCTGATAGAATGAGA       |
| D5S400 (R)   | TTCCTAATTTGCTGGCTTCC       |
| D6S257 (F)   | GAGAACTCGTCCTTTGGTCC       |
| D6S257 (R)   | TGAGAAAATGTTTCAGGCTAAAGATA |
| D6S460 (F)   | AATTCCCATTTGAAGAAACC       |
| D6S460 (R)   | CAGTGGGCTCTCACCC           |
| D7S820 (F)   | CCAATATTTGGTGCAATTC        |
| D7S820 (R)   | CCTTAAAAATCTGAGGTATC       |
| D8S532 (F)   | GCTCAAAGCCTCCAATGAC        |
| D8S532 (R)   | GACTTCGTGATCCACCTGC        |
| D9S1874 (F)  | GTATAGTATGGAGCAGAAATGTAAC  |
| D9S1874 (R)  | GGCCAAGGGATAAACAG          |
| D10S1790 (F) | AGTGAAATGGCTACAACCAA       |
| D10S1790 (R) | GCCTGAGATACATAAGGTGCT      |
| D12S1663 (F) | GCCCATGATACTAAGTGAGAAATAC  |
| D12S1663 (R) | GTAAAACGTGAAACAATCCTAAGA   |
| D13S175 (F)  | TATTGGATACTTGAATCTGCTG     |
| D13S175 (R)  | TGCATCACCTCACATAGGTTA      |
| D13S317 (F)  | ACAGAAGTCTGGGATGTGGA       |
| D13S317 (R)  | GCCCAAAAAGACAGACAGAA       |
| D15S128 (F)  | GCTGTGTGTAAGTGTGTTTTATATC  |
| D15S128 (R)  | GCAAGCCAGTGGAGAG           |
| D16S539 (F)  | GATCCCAAGCTCTTCTCTT        |
| D16S539 (R)  | ACGTTTGTGTGTGCATCTGT       |
| D19S414 (F)  | CCAGACCTGTCCATCTTGTATGAAT  |
| D19S414 (R)  | TTAGAACAACGCTTGGGCATTT     |
| D19S566 (F)  | AGCTTCAGAGGCCATAGC         |
| D19S566 (R)  | CAGGTAGGGCTGGAATGTT        |
| D19S865 (F)  | GCTATTTGGGTCTCTATCAATG     |
| D19S865 (R)  | GAAATCGCACAGTATTTGTCTCAC   |
| DXS991 (F)   | ACTTCAACCACAGAAGCCTC       |



|            |                     |
|------------|---------------------|
| DXS991 (R) | ATCATTGAGCCAATTCTCC |
|------------|---------------------|

**Supplementary Data Script of the bioinformatics pipeline used.**

```
bwa mem -t 24 -R '@RG\tID:1-3\tSM:1-3\tPL:Illumina\tPU:Hiseq2500' -M
~/98/hg18/ucsc.hg18.fasta 1-3_R1.fastq.gz 1-3_R2.fastq.gz > 1-3.sam
```

```
bwa mem -t 24 -R '@RG\tID:1-3\tSM:1-4\tPL:Illumina\tPU:Hiseq2500' -M
~/98/hg18/ucsc.hg18.fasta 1-4_R1.fastq.gz 1-4_R2.fastq.gz > 1-4.sam
```

```
bwa mem -t 24 -R '@RG\tID:2-6\tSM:2-6\tPL:Illumina\tPU:Hiseq2500' -M
~/98/hg18/ucsc.hg18.fasta 2-6_R1.fastq.gz 2-6_R2.fastq.gz > 2-6.sam
```

```
bwa mem -t 24 -R '@RG\tID:2-7\tSM:2-7\tPL:Illumina\tPU:Hiseq2500' -M
~/98/hg18/ucsc.hg18.fasta 2-7_R1.fastq.gz 2-7_R2.fastq.gz > 2-7.sam
```

```
for f in *.sam; do samtools flagstat $f > ${f}.sam/.stat; done
for f in *.sam; do samtools sort -@ 24 -o ${f}.sam/_sorted.bam} $f; done
```

```
for f in *.bam; do java -jar /usr/local/bin/picard.jar MarkDuplicates I=$f
O=${f}.bam/_1duplicates.bam} M=${f}.bam/_dup_metrics.txt}; done
```

```
for f in *_1duplicates.bam; do samtools index $f; done
```

```
for f in *_1duplicates.bam; do java -jar -Xmx17G /home/gatk/gatk-package-4.0.6.0-local.jar
BaseRecalibrator -I $f -R ~/98/hg18/ucsc.hg18.fasta --known-sites ~/98/hg18
/bundle/hg18/dbsnp_138.hg18.vcf -O ${f}.bam/.grp; done
```

```
for f in *_1duplicates.bam; do java -jar -Xmx17G /home/gatk/gatk-package-4.0.6.0-local.jar
ApplyBQSR -I $f -R ~/98/hg18/ucsc.hg18.fasta --bqsr-recal-file ${f}.bam/.grp} -O
${f}.bam/_recal.bam}; done
```

```
for f in *_recal.bam; do java -jar /home/gatk/gatk-package-4.0.6.0-local.jar HaplotypeCaller -
R ~/98/hg18/ucsc.hg18.fasta -I $f -O ${f}.bam/.vcf} -bamout ${f}.bam/_bamout.bam};
done
```
